# Supplementary material
Source: PubMed Central journal article supplement (PMC7605434)
Supplement: 10038_2020_808_MOESM1_ESM.pdf [file 10038_2020_808_MOESM1_ESM.pdf]

Supplementary Data for

**SARS-CoV-2 genomic variations associated with mortality rate of COVID-19**

Yujiro Toyoshima<sup>1</sup>, Kensaku Nemoto<sup>1</sup>, Saki Matsumoto<sup>1</sup>, Yusuke Nakamura<sup>1</sup>,  
Kazuma Kiyotani<sup>1</sup>

<sup>1</sup>Project for Immunogenomics, Cancer Precision Medicine Center, Japanese  
Foundation for Cancer Research, Tokyo 135-8550, Japan

*Index of Supplementary Data*

**Supplementary Figure 1.** Frequencies of SARS-CoV-2 variants among the three clusters.

**Supplementary Figure 2.** Global maps for the frequencies of SARS-CoV-2 variants.

**Supplementary Figure 3.** Linkage disequilibrium (LD) map of mutations in 12,266 SARS-CoV-2 sequences.

**Supplementary Figure 4.** Correlation analysis of frequency of SARS-CoV-2 N 203K/204R variant (A) or haplotype frequency of S 614G/N 203R/204G (B) with fatality rates of COVID-19 among 28 countries.

**Supplementary Figure 5.** Correlation analysis of frequencies of SARS-CoV-2 ORF1ab 4715L (A) or S 614G variants (B) with fatality rates of COVID-19 among 27 countries and 17 states in the United States.

**Supplementary Figure 6.** Association of the strains of BCG vaccine with fatality rates of COVID-19 among 28 countries.

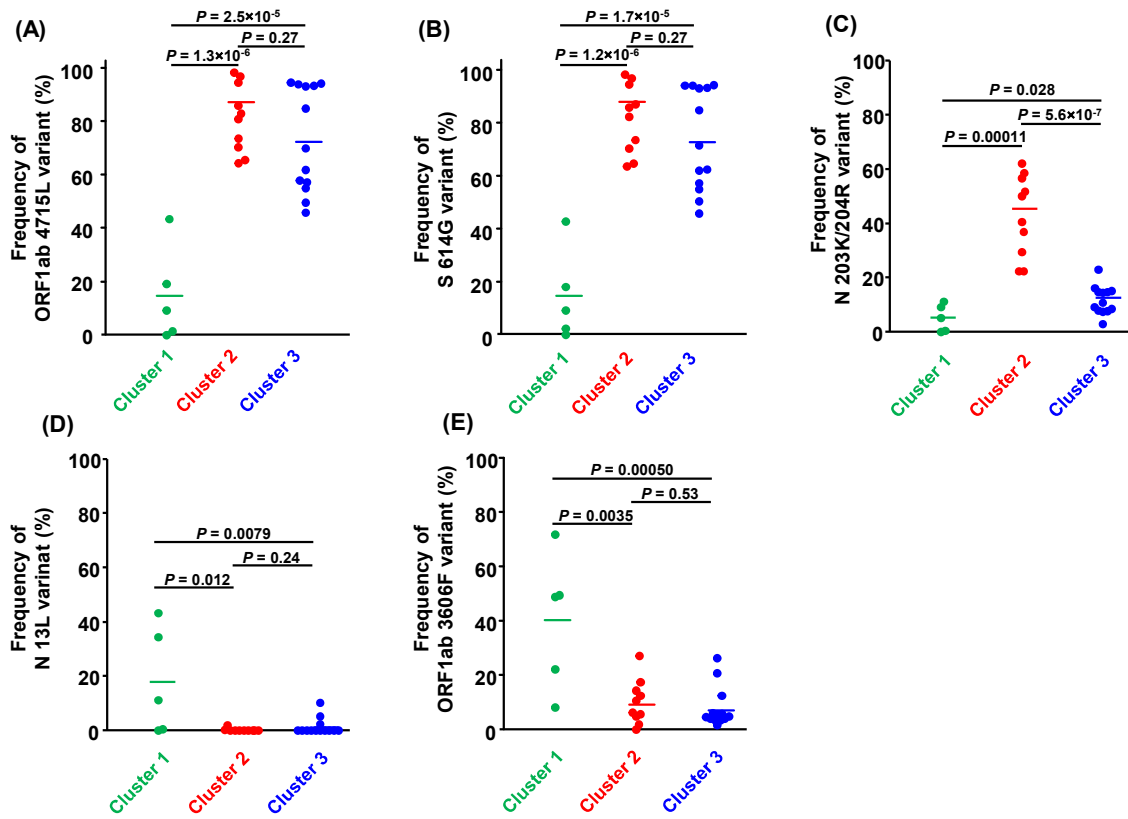

**Supplementary Figure 1. Frequencies of SARS-CoV-2 variants among the three clusters.** (A) ORF1ab 4715L, (B) S 614G, (C) N 203K/204R, (D) N 13L, (E) ORF1ab 3606F. Horizontal lines represent the means. The Student's *t* test was used to evaluate statistical significance. Color of each dot was corresponding to the mutational clusters shown in Fig. 1A.

(A) ORF1ab 4715L

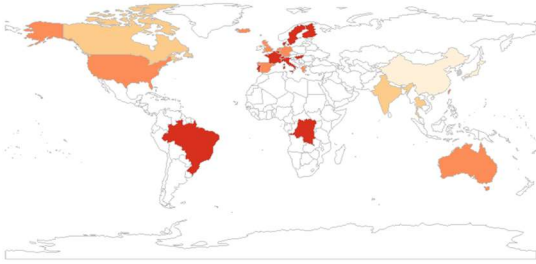

(B) S 614G

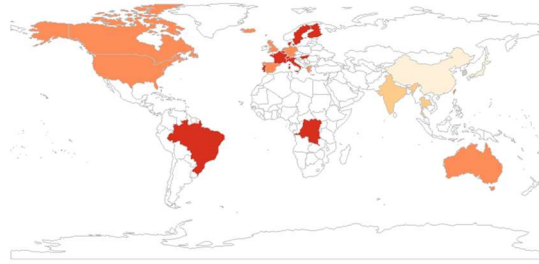

(C) N 203K/204R

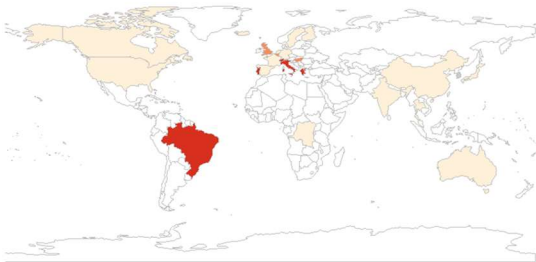

(D) N 13L

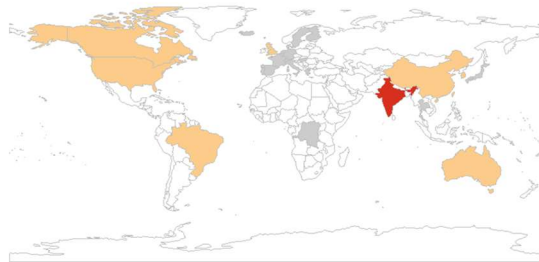

(E) ORF1ab 3606F

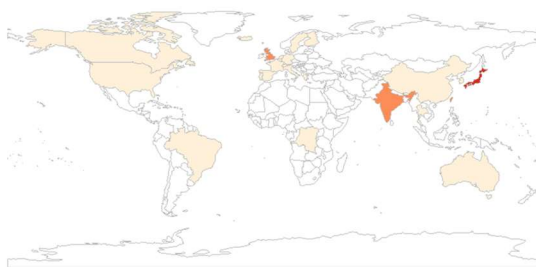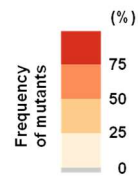

**Supplementary Figure 2. Global maps for the frequencies of SARS-CoV-2 variants. (A) ORF1ab 4715L, (B) S 614G, (C) N 203K/204R, (D) N 13L, (E) ORF1ab 3606F.**

(A)

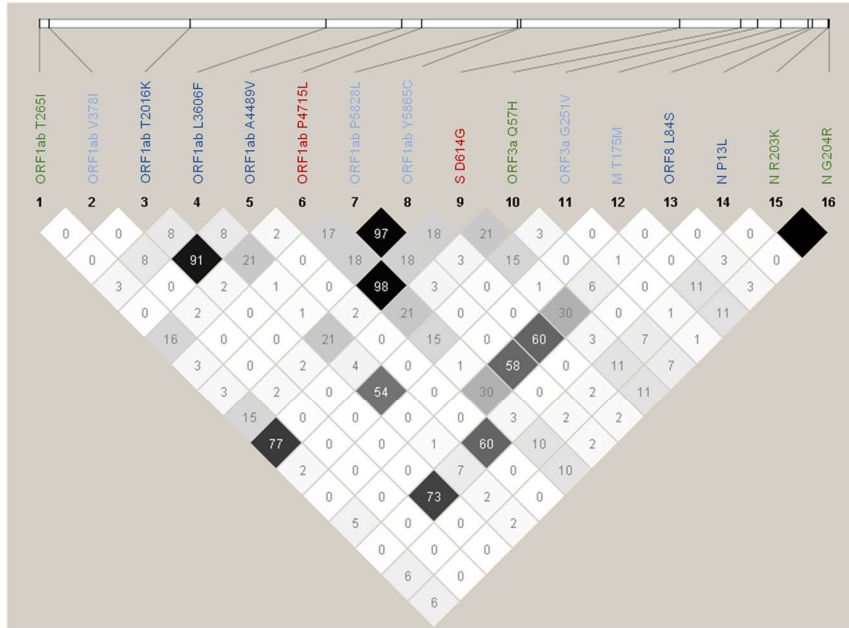

(B)

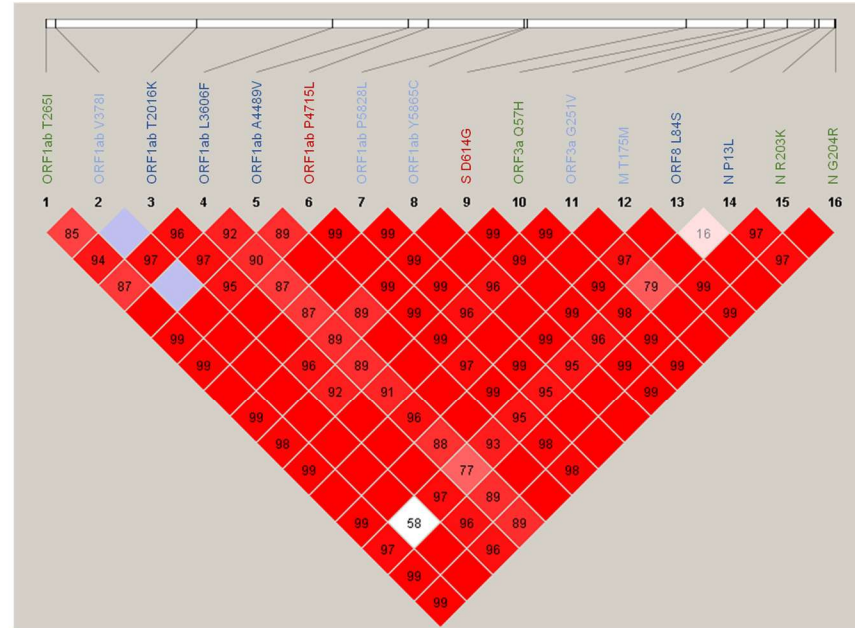

**Supplementary Figure 3. Linkage disequilibrium (LD) map of mutations in 12,266 SARS-CoV-2 sequences. (A)  $r^2$ -based and (B)  $D'$ -based LD maps were drawn for 16 mutations, which were found at 10% in at least 2 of the 28 countries.**

(A)

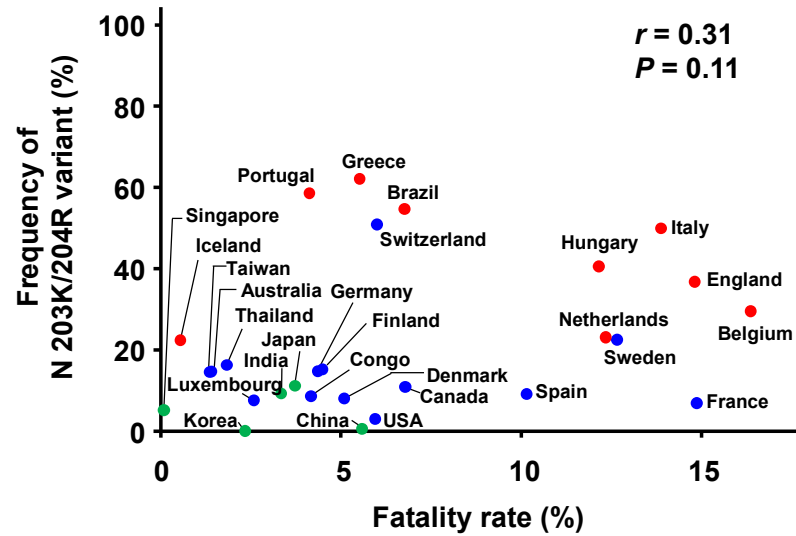

(B)

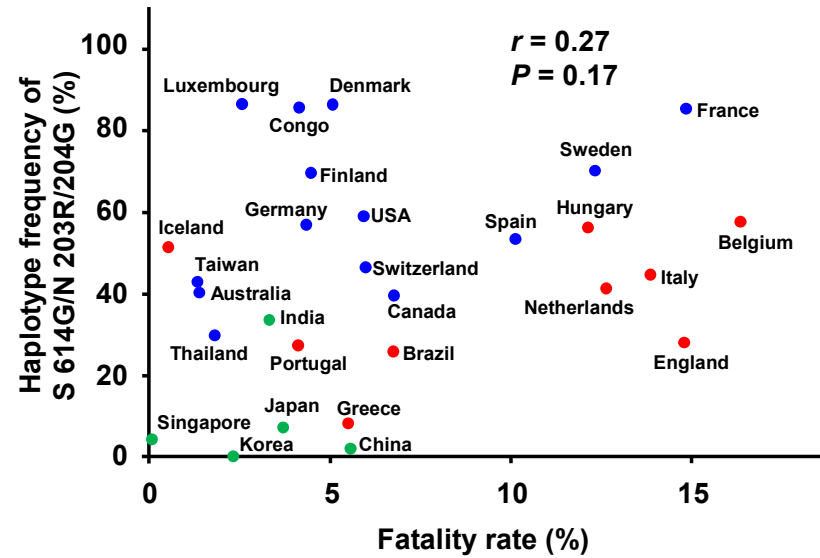

Supplementary Figure 4. Correlation analysis of frequency of SARS-CoV-2 N 203K/204R variant (A) or haplotype frequency of S 614G/N 203R/204G (B) with fatality rates of COVID-19 among 28 countries. Pearson's correlation coefficients ( $r$ ) were calculated. Colors of each dot were corresponding to the mutational clusters shown in Fig. 1A

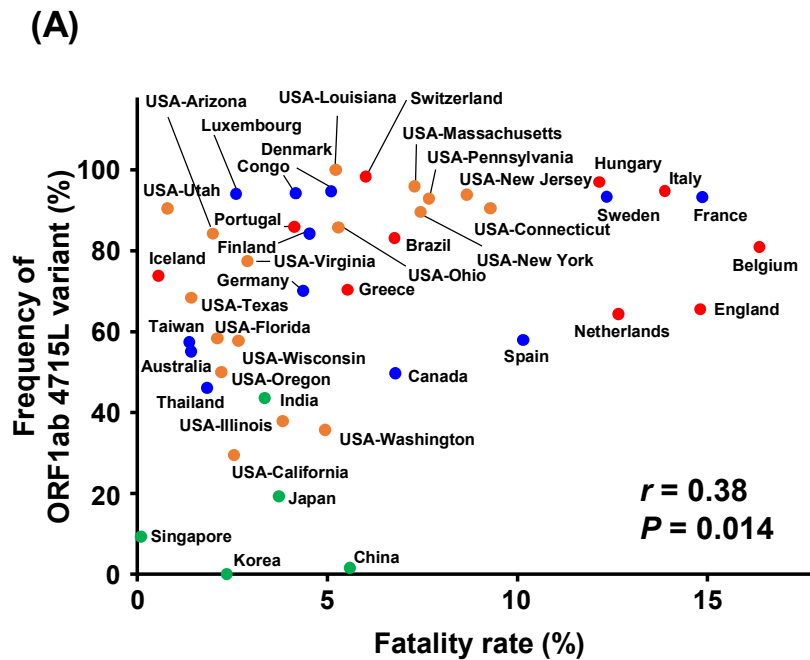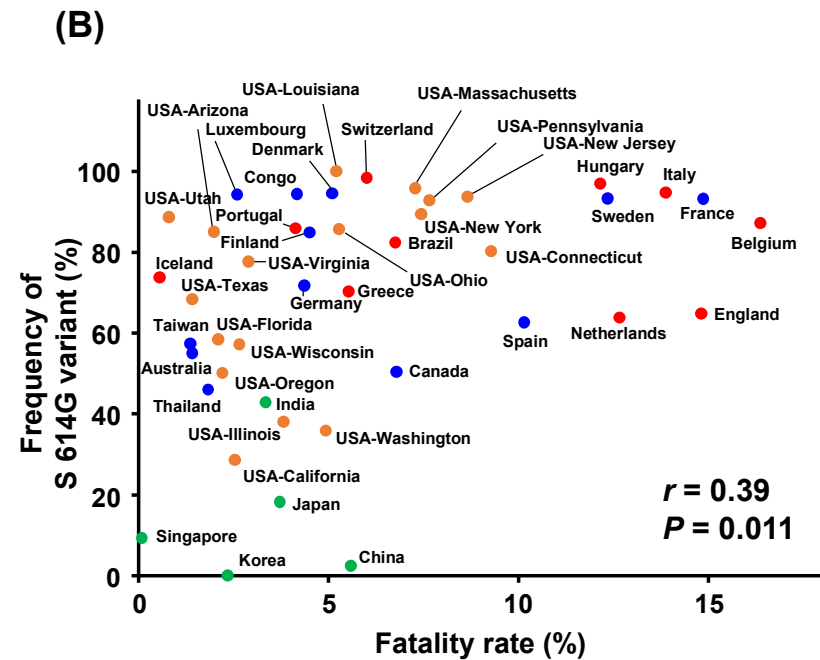

**Supplementary Figure 5. Correlation analysis of frequencies of SARS-CoV-2 ORF1ab 4715L (A) or S 614G variants (B) with fatality rates of COVID-19 among 27 countries and 17 states in United States. Pearson's correlation coefficients ( $r$ ) were calculated. Colors of each dot were corresponding to the mutational clusters shown in Fig. 1A.**

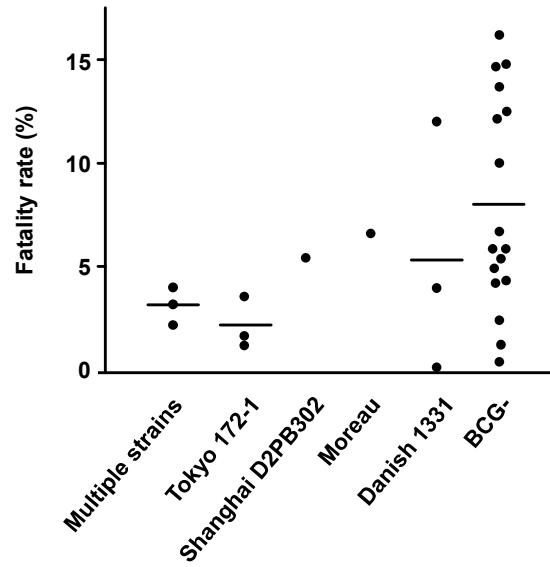

**Supplementary Figure 6. Association of the strains of BCG vaccine with fatality rates of COVID-19 among 28 countries.** Fatality rates in the countries using different strains of BCG vaccine and BCG-non-vaccinated countries (BCG-). Horizontal lines represent the means.
